# Supplementary material
Source: PubMed Central journal article supplement (PMC3650325)
Supplement: supp_M112.020230_mcp.M112.020230-5.pdf [file supp_M112.020230_mcp.M112.020230-5.pdf]

Supplemental Table S4

| Protein name              | CG      | FR9    | FR8    | FR7    | FR6    | FR5    | FR4    | FR3    | FR2    | FR1    |
|---------------------------|---------|--------|--------|--------|--------|--------|--------|--------|--------|--------|
| Seipin                    | CG9904  | 0.1168 | 0.1027 | 0.1317 | NaN    | 0.0272 | NaN    | NaN    | 0.1598 | 1.0000 |
| SelT-like protein         | CG3887  | 0.3391 | 0.3785 | 0.2793 | 0.0126 | 0.0119 | 0.0268 | 0.1268 | 0.1420 | 1.0000 |
| MBOAT                     | CG9526  | 0.1401 | 0.1356 | 0.1324 | 0.0305 | 0.0275 | 0.0277 | 0.1003 | 0.1501 | 1.0000 |
| Lunakpark                 | CG8735  | 0.0727 | 0.0506 | 0.0625 | 0.0301 | 0.0247 | 0.0261 | 0.0937 | 0.1582 | 1.0000 |
| Steroid binding protein   | CG9066  | 0.3341 | 0.3783 | 0.2701 | 0.0285 | 0.0167 | 0.0521 | 0.1438 | 0.1421 | 1.0000 |
| Sec14 homolog             | CG13848 | 0.0496 | 0.0346 | 0.0790 | 0.0416 | 0.0987 | 0.0282 | 0.1856 | 0.2248 | 1.0000 |
| Lyso-PA acyltransferase   | CG32699 | 0.1675 | 0.1814 | 0.1576 | 0.0133 | 0.0210 | 0.0436 | 0.2393 | 0.2654 | 1.0000 |
| Fatp                      | CG7400  | 0.2991 | 0.3700 | 0.2657 | 0.0360 | 0.0181 | 0.0222 | 0.1715 | 0.1848 | 1.0000 |
| Short chain dehydrogenase | CG2064  | 0.3164 | 0.3362 | 0.2604 | 0.0118 | 0.0143 | 0.0290 | 0.1729 | 0.1758 | 1.0000 |
| Fas-associated factor2    | CG10372 | 0.1335 | 0.0972 | 0.1041 | 0.0500 | 0.0670 | 0.0746 | 0.2173 | 0.2365 | 1.0000 |
| Brummer                   | CG5295  | 0.0623 | 0.0500 | 0.0637 | 0.0529 | 0.0525 | 0.0309 | 0.1076 | 0.1259 | 1.0000 |
| CGI-58                    | CG1882  | 0.0625 | 0.0325 | 0.0856 | 0.0274 | 0.0177 | 0.0339 | 0.2868 | 0.2365 | 1.0000 |
| HSL                       | CG11055 | 0.0458 | 0.0320 | 0.0628 | 0.0401 | 0.0447 | 0.0539 | 0.1415 | 0.1754 | 1.0000 |
| Prenyltransferase         | CG10778 | 0.1221 | 0.1138 | 0.1101 | 0.4062 | NaN    | NaN    | 0.1414 | 0.1662 | 1.0000 |
| Lipase                    | CG17292 | 0.0657 | 0.0380 | 0.1536 | 0.0149 | 0.0163 | 0.0335 | 0.3936 | 0.3119 | 1.0000 |
| Oxysterol-binding protein | CG1513  | 0.2403 | 0.1883 | 0.1275 | 0.1250 | 0.1255 | 0.1825 | 0.2225 | 0.1074 | 1.0000 |
| Tango 14                  | CG4775  | 0.1272 | 0.1255 | 0.1073 | 0.0290 | 0.0491 | 0.2306 | 0.1636 | 0.1942 | 1.0000 |
| Phospholipase D           | CG7718  | 0.1505 | 0.0844 | 0.1429 | 0.2114 | 0.1827 | 0.0449 | 0.3744 | 0.3168 | 1.0000 |

Normalized Ratios H/L of all nine purification fractions for all proteins whose localization was analyzed by fluorescent microscopy.
