# Supplementary material
Source: PubMed Central journal article supplement (PMC3650325)

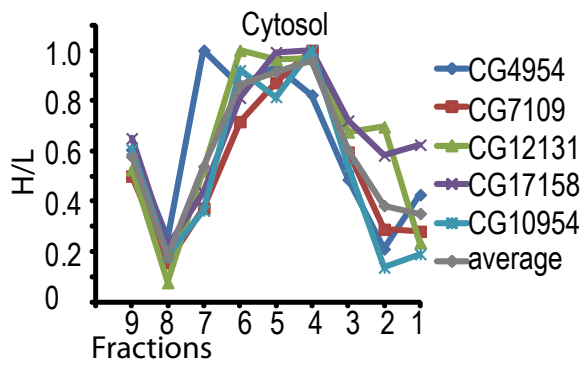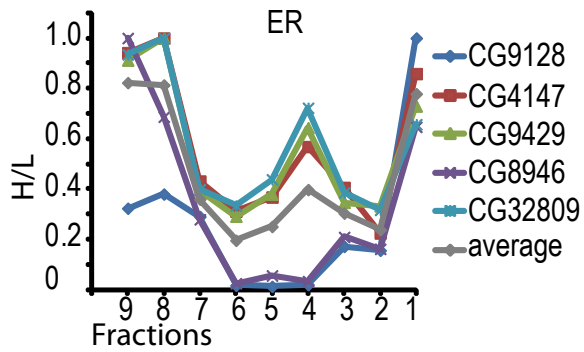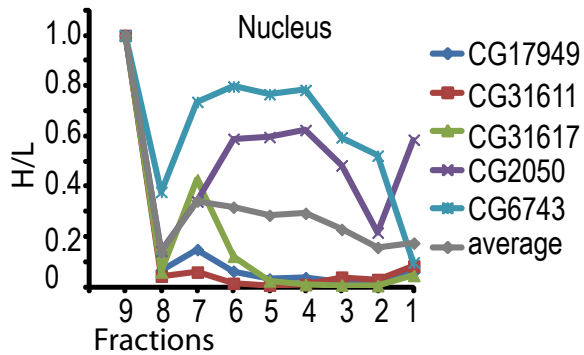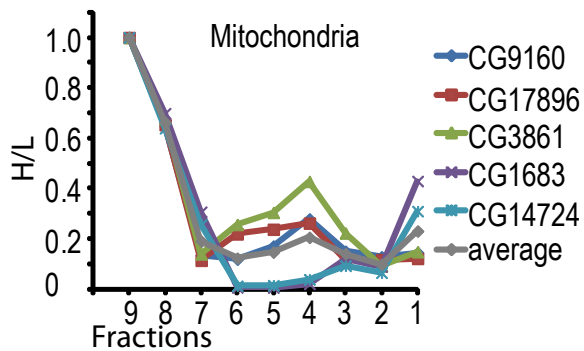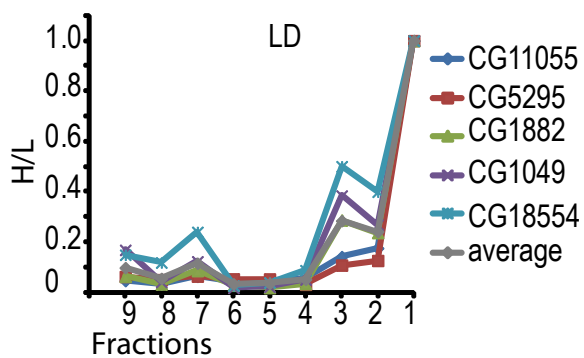

Krahmer et al., supplemental Figure 1

Supplement: supp_M112.020230_mcp.M112.020230-7.pdf [file supp_M112.020230_mcp.M112.020230-7.pdf]
